# Supplementary material for: CBMAR: a comprehensive β-lactamase molecular annotation resource
Source: Oxford University Press journal article supplement (doi:10.1093/database/bau111), 2014-01-01
Supplement: bau111_Supplementary_Data.zip [file cbmar_supplementry_file.doc]

**Table S1.** Family-wise distribution of variants and proteins in each family of β-lactamase in CBMAR. Gram phenotype shows the character of pathogen carrying the β-lactamase gene. Genetic location indicates the gene location in genome.

| **Class** | **Family** | **Gram phenotype** | **Number of variants** | **Number of sequences in family** | **Genetic location** |
| --- | --- | --- | --- | --- | --- |
|
| A | AER | - | 1 | 1 | Plasmid |
| AST | + | 1 | 4 | Plasmid |
| BEL | - | 3 | 3 | Plasmid |
| BES | - | 1 | 1 | Plasmid |
| BLAF | + | 1 | 4 | Plasmid |
| BlaZ | + | 1 | 5 | Plasmid |
| BPS | - | 1 | 5 | Chromosomal |
| BRO | - | 2 | 17 | Chromosomal |
| CARB | - | 10 | 22 | Plasmid |
| CEPA | - | 6 | 7 | Chromosomal |
| CFXA | - | 6 | 10 | Chromosomal |
| CKO | - | 2 | 3 | Chromosomal |
| ClbA | - | 4 | 6 | Chromosomal |
| CME | - | 2 | 3 | Chromosomal |
| CSP | - | 1 | 1 | Chromosomal |
| CTXM | - | 127 | 214 | Plasmid |
| CumA | - | 1 | 1 | Chromosomal |
| DES | - | 1 | 1 | Chromosomal |
| FAR | + | 1 | 2 | Chromosomal/Plasmid |
| ERP | - | 1 | 1 | Chromosomal |
| FONA | - | 6 | 6 | Chromosomal/Plasmid |
| FEC-1 | - | 1 | 1 | Plasmid |
| GES | - | 21 | 33 | Plasmid |
| HUGA | - | 1 | 1 | Plasmid |
| HERA | - | 3 | 3 | Plasmid |
| IBC | - | 2 | 3 | Plasmid |
| IMI | - | 4 | 6 | Plasmid |
| BIC | - | 1 | 1 | Chromosomal |
| KLUA | - | 8 | 8 | Plasmid |
| KLUC | - | 3 | 3 | Plasmid |
| KLUG | - | 1 | 1 | Chromosomal |
| KLUY | - | 4 | 4 | Chromosomal |
| KPC | - | 17 | 97 | Plasmid |
| LAP | - | 2 | 4 | Plasmid |
| LEN | + | 7 | 16 | Chromosomal |
| LRG | - | 1 | 1 | Chromosomal |
| LUT | - | 6 | 6 | Chromosomal |
| MAL | - | 2 | 2 | Chromosomal |
| NMC | - | 1 | 2 | Chromosomal |
| OHIO | - | 1 | 1 | Plasmid |
| OKP | - | 2 | 25 | Chromosomal |
| ORN | - | 6 | 6 | Chromosomal |
| OXY | - | 14 | 27 | Chromosomal |
| PENA | - | 1 | 18 | Chromosomal |
| PER | - | 7 | 17 | Plasmid |
| PLA | - | 4 | 4 | Chromosomal |
| PSE | - | 5 | 46 | Plasmid |
| RAHN | - | 2 | 2 | Chromosomal |
| RTG | - | 2 | 2 | Plasmid |
| ROB | + | 1 | 11 | Plasmid |
| SCO | - | 1 | 5 | Plasmid |
| SED | - | 1 | 1 | Chromosomal |
| SFC | - | 1 | 1 | Plasmid |
| SFO | - | 1 | 2 | Chromosomal/Plasmid |
| SHV | - | 140 | 221 | Plasmid/Chromosomal |
| SME | - | 5 | 6 | Chromosomal |
| TEM | - | 148 | 320 | Plasmid |
| TER | - | 2 | 2 | Chromosomal |
| TLA | - | 2 | 2 | Plasmid |
| TOHO | - | 2 | 4 | Plasmid |
| VHH | - | 1 | 1 | Plasmid |
| VHW | - | 1 | 1 | Plasmid |
| VEB | - | 8 | 20 | Plasmid |
| ACI | - | 1 | 1 | Plasmid |
| B1 | Blab | - | 14 | 23 | Chromosomal |
| CcrA | - | 1 | 1 | Plasmid |
| CGB | - | 1 | 1 | Plasmid |
| DIM | - | 1 | 2 | Integron |
| EBR | - | 1 | 1 | Chromosomal |
| GIM | - | 1 | 7 | Plasmid |
| IMP | - | 39 | 126 | Plasmid/Chromosomal |
| IND | - | 14 | 19 | Chromosomal |
| JOHN | - | 1 | 1 | Chromosomal |
| KHM | - | 1 | 1 | Plasmid |
| NDM | - | 10 | 32 | Plasmid |
| SFB | - | 1 | 1 | Chromosomal |
| SIM | - | 1 | 3 | Plasmid |
| SLB | - | 1 | 1 | Chromosomal |
| SPM | - | 1 | 1 | Chromosomal |
| TMB | - | 1 | 2 | Chromosomal |
| TUS | - | 1 | 1 | Chromosomal |
| MUS | - | 1 | 1 | Chromosomal |
| VIM | - | 34 | 79 | Plasmid |
| B2 | CphA | - | 7 | 12 | Chromosomal |
| SFH | - | 1 | 1 | Chromosomal |
| ImiS | - | 1 | 1 | Unknown |
| B3 | AIM | - | 1 | 1 | Chromosomal |
| AMO | - | 1 | 1 | Chromosomal |
| L1 | - | 1 | 20 | Chromosomal |
| BJP | - | 1 | 1 | Unknown |
| CAU | - | 1 | 1 | Chromosomal |
| FEZ | - | 1 | 1 | Chromosomal |
| GOB | - | 10 | 12 | Chromosomal |
| LRA | - | 12 | 12 | Unknown |
| M1B1B | - | 1 | 1 | Unknown |
| POM-1 | - | 1 | 1 | Chromosomal |
| SMB | - | 1 | 1 | Plasmid |
| THIN-B | - | 1 | 1 | Plasmid |
| C | ACC | - | 10 | 12 | Chromosomal |
| AmpC | - | 1 | 156 | Plasmid |
| ACT | - | 14 | 14 | Plasmid |
| BIL | - | 1 | 1 | Plasmid |
| CFE | - | 1 | 1 | Plasmid |
| CMY | - | 89 | 112 | Plasmid |
| DHA | - | 7 | 15 | Plasmid |
| EBC | - | 1 | 1 | Plasmid |
| FOX | - | 10 | 12 | Plasmid |
| LAT | - | 3 | 3 | Plasmid |
| MIR | - | 5 | 6 | Plasmid |
| MOX | - | 7 | 7 | Plasmid |
| SRT | - | 1 | 2 | Chromosomal |
| SST | - | 1 | 1 | Chromosomal |
| D | OXA | - | 242 | 363 | Plasmid |
| LCR | - | 1 | 5 | Plasmid |
