# Supplementary material for: CBMAR: a comprehensive β-lactamase molecular annotation resource
Source: Oxford University Press journal article supplement (doi:10.1093/database/bau111), 2014-01-01
Supplement: bau111_Supplementary_Data.zip [file New Microsoft Office Word Document.docx]

# Supplementary Data

**Table S1:** Family-wise distribution of variants and proteins in each family of β-lactamase in CBMAR.
